# Supplementary material for: Enzymatic Synthesis of Amino Acids Endcapped Polycaprolactone: A Green Route Towards Functional Polyesters
Source: MDPI journal article supplement (doi:10.3390/molecules23020290), 2018-01-30
Supplement: s1 [file s1]

# Enzymatic Synthesis of Amino Acids Endcapped Polycaprolactone: A Green Route towards Functional Polyesters

Stéphane W. Duchiron <sup>1</sup>, Eric Pollet <sup>1,\*</sup>, Sébastien Givry <sup>2</sup> and Luc Avérous <sup>1,\*</sup>

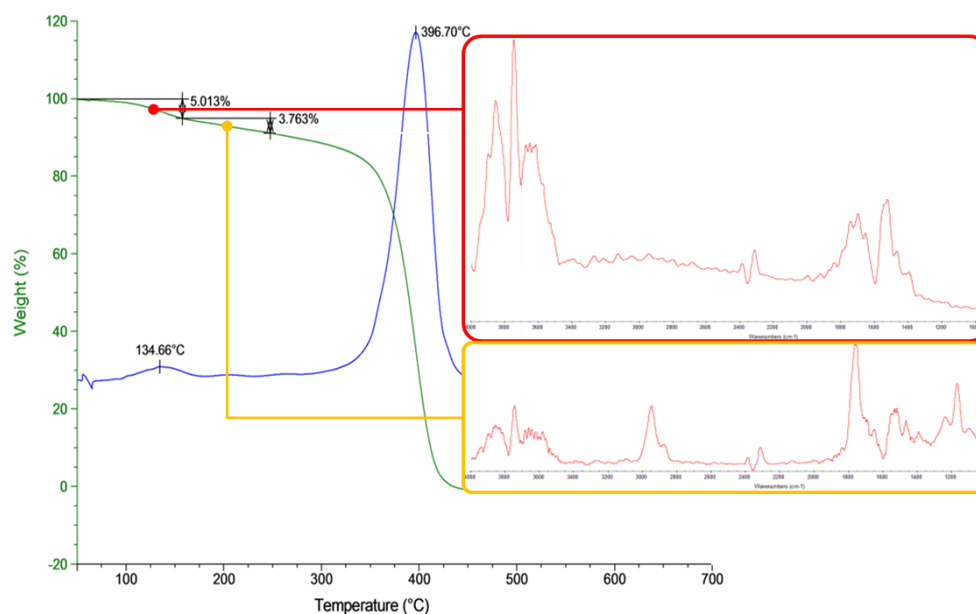

**Figure S1.** TGA-FTIR coupling analysis of polymerization product between CL and unprotected amino acid (10 mol% of Met in the feed) presenting the polymer main degradation (at ca. 400 °C). Red inlay (top) shows FTIR spectrum of evolved gas containing mainly water moisture. Yellow inlay (bottom) shows FTIR spectrum of evolved gas containing mainly CL residual monomer.

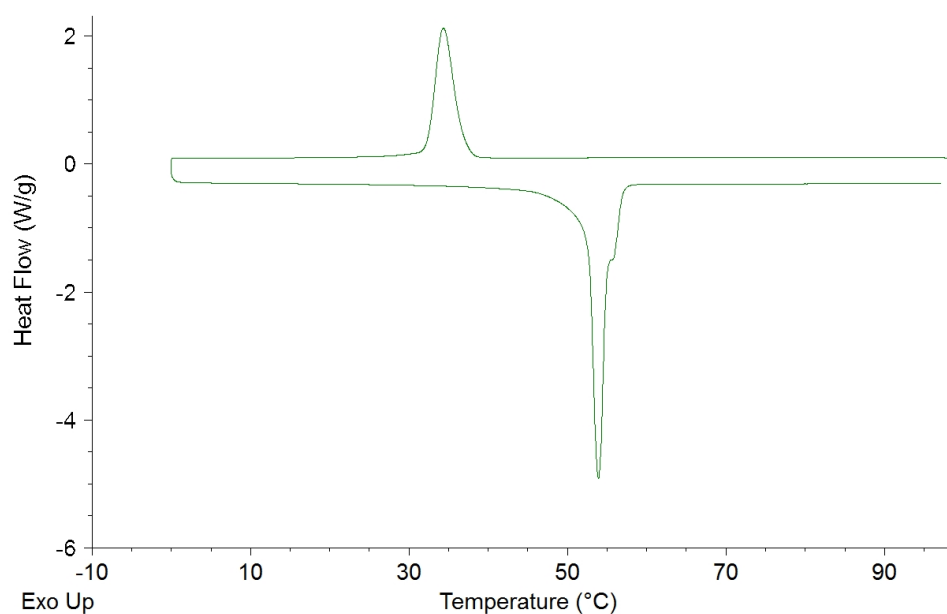

**Figure S2.** Representative DSC thermogram of polymerization product between CL and 2 mol% of N-Boc Cys HE (cooling scan followed by second heating scan).

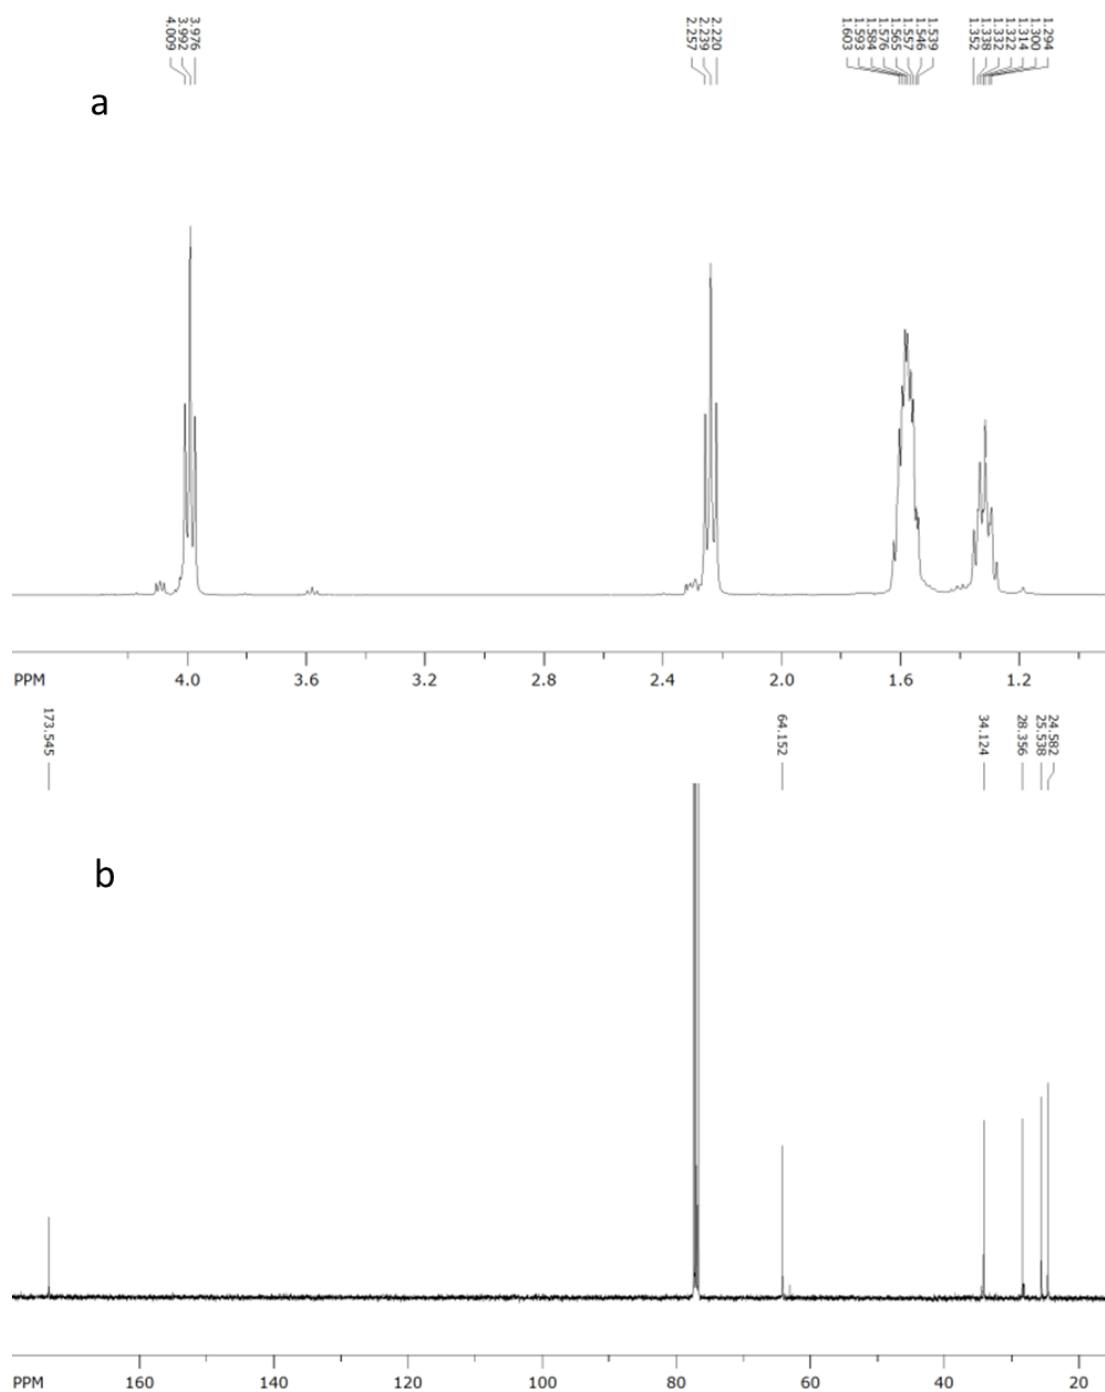

**Figure S3.** (a)  $^1\text{H}$  NMR and (b)  $^{13}\text{C}$  NMR typical spectra of polymerization product between CL and unprotected amino acid (example of 10 mol% of Cys in the feed).

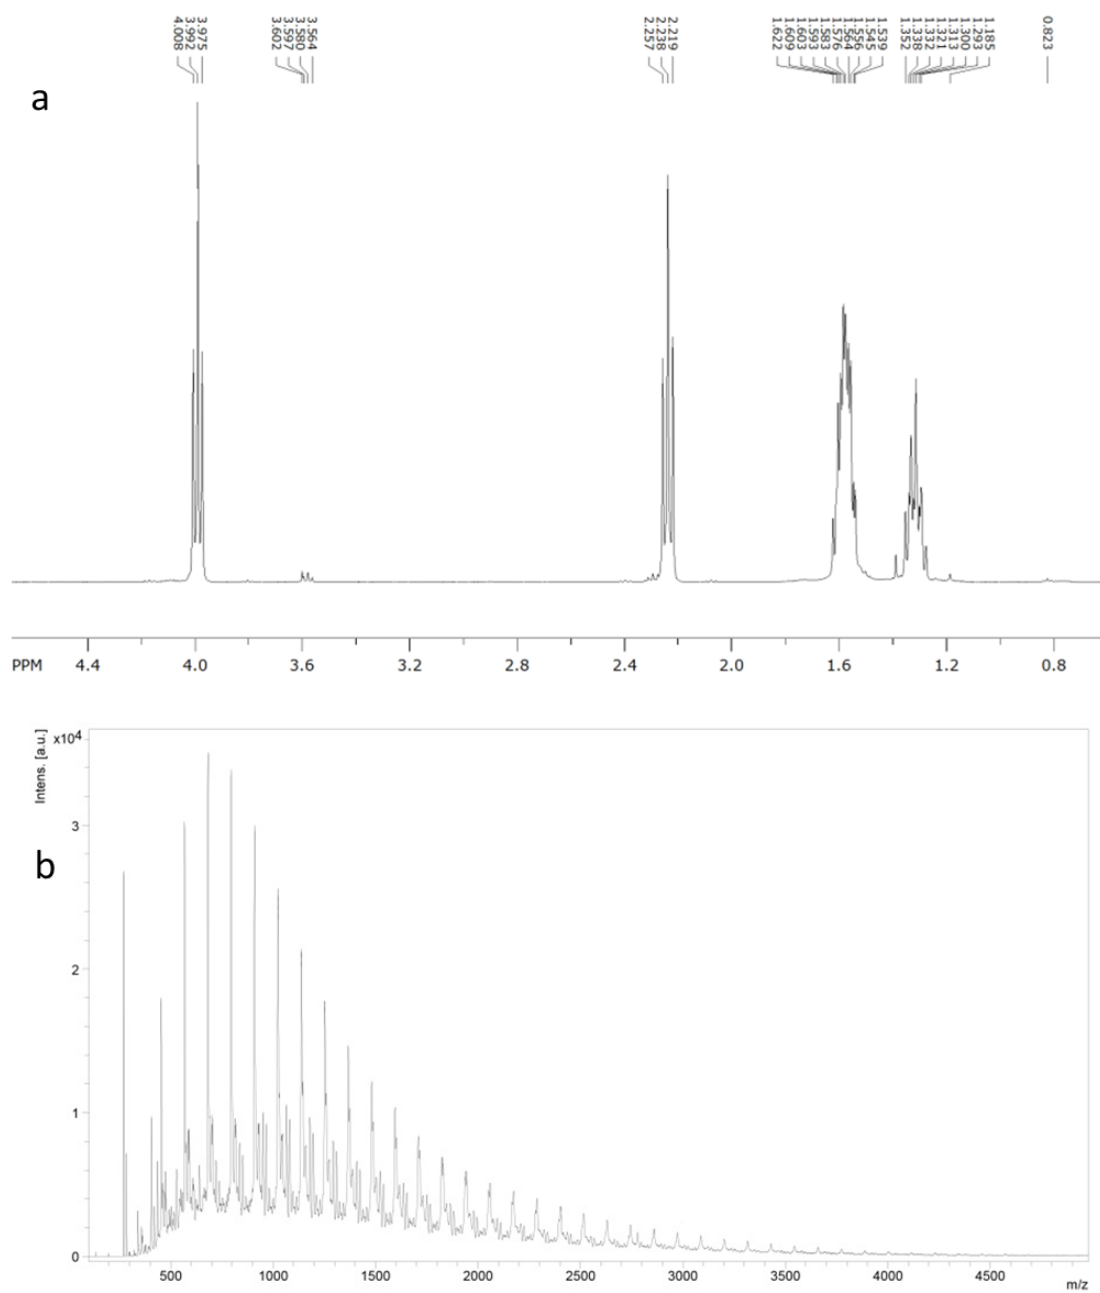

**Figure S4.** (a)  $^1\text{H}$  NMR and (b) MALDI-ToF spectra of polymerization product between CL and 1 mol% of N-Boc Cys HE.

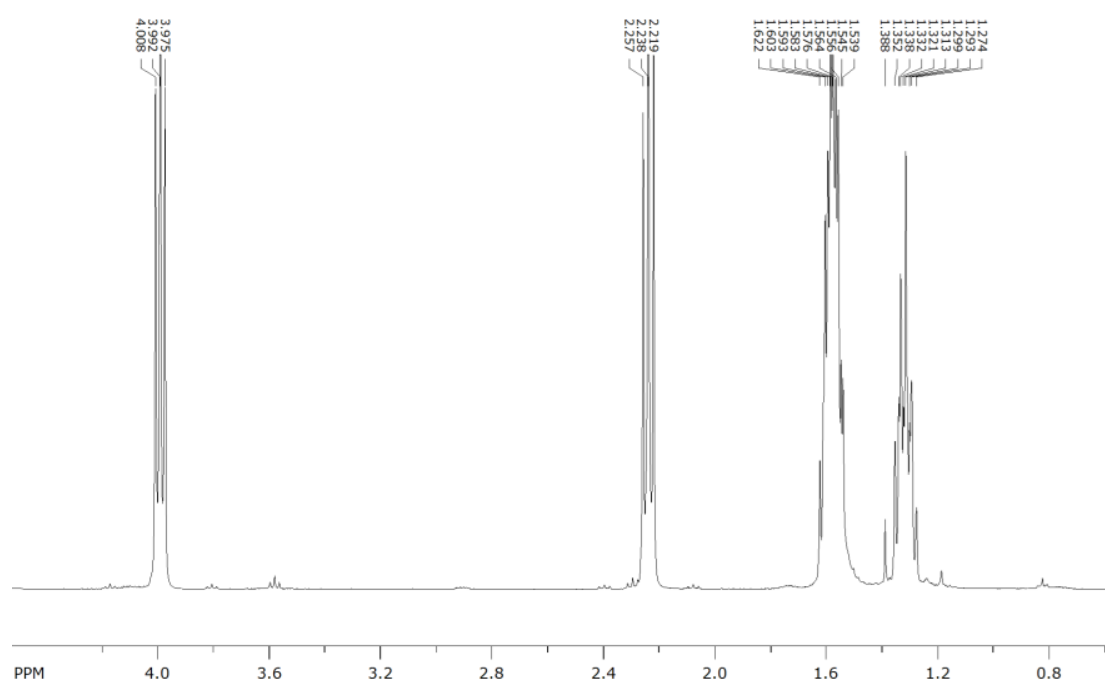

**Figure S5.** <sup>1</sup>H NMR spectrum of polymerization product between CL and 2 mol% of N-Boc Cys HE.

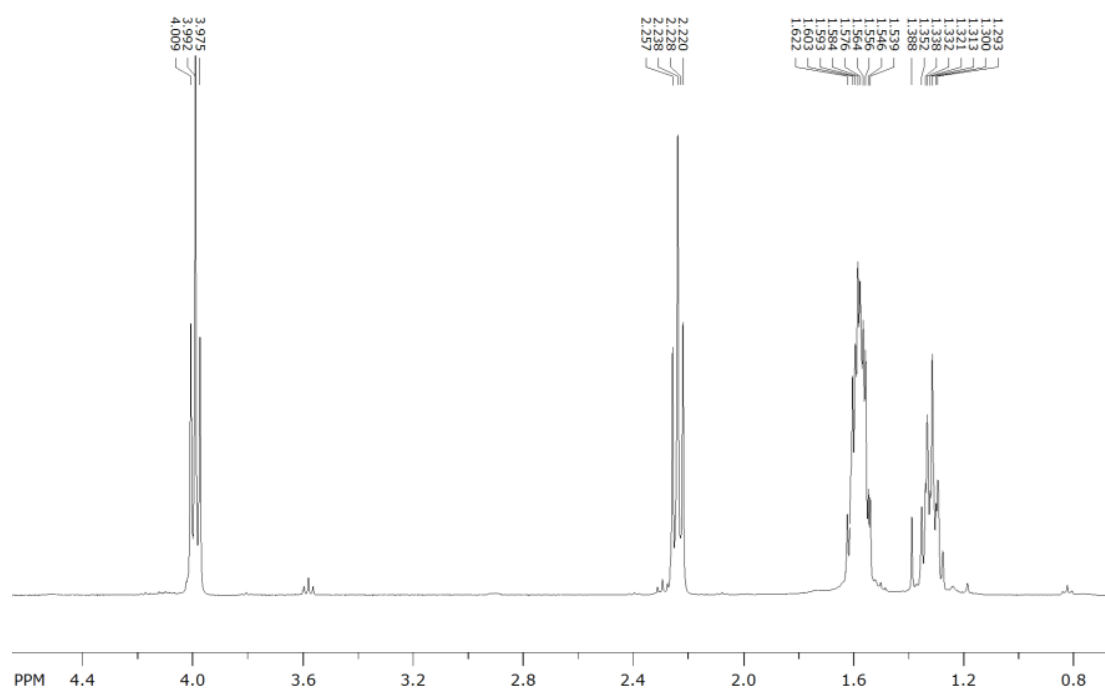

**Figure S6.** <sup>1</sup>H NMR spectrum of polymerization product between CL and 5 mol% of N-Boc Cys HE.
